# Supplementary material for: RECON-Dependent Inflammation in Hepatocytes Enhances Listeria monocytogenes Cell-to-Cell Spread
Source: PubMed Central journal article supplement (PMC5954220; doi:10.1128/mbio.00526-18), 2018-05-15
Supplement: mbo003183888sf1.pdf [file mbo003183888sf1.pdf]

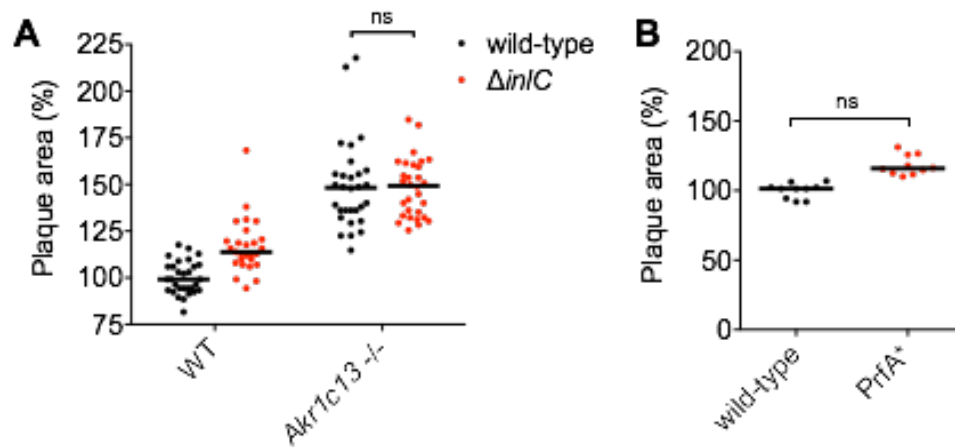

**Supplemental Figure 1 (Related to Main Figure 2). Increased cell-to-cell spread in RECON-deficient cells is likely not due to direct enhancement of *L. monocytogenes* virulence programs.**

(A) Quantification of plaque areas of wild-type or  $\Delta inlC$  *L. monocytogenes* at 72 hpi in WT or *Akr1c13*<sup>-/-</sup> TIB73 hepatocytes.

(B) Plaque areas of wild-type or PrfA\* *L. monocytogenes* at 72 hpi in WT TIB73 hepatocytes.

Data are plotted as percent of wild-type *L. monocytogenes* in WT TIB73 cells, and median values are indicated by a bar. All plaque areas measured are shown. Data are representative of two independent experiments. ns = not significant.
