# Supplementary material for: RECON-Dependent Inflammation in Hepatocytes Enhances Listeria monocytogenes Cell-to-Cell Spread
Source: PubMed Central journal article supplement (PMC5954220; doi:10.1128/mbio.00526-18), 2018-05-15
Supplement: mbo003183888sf2.pdf [file mbo003183888sf2.pdf]

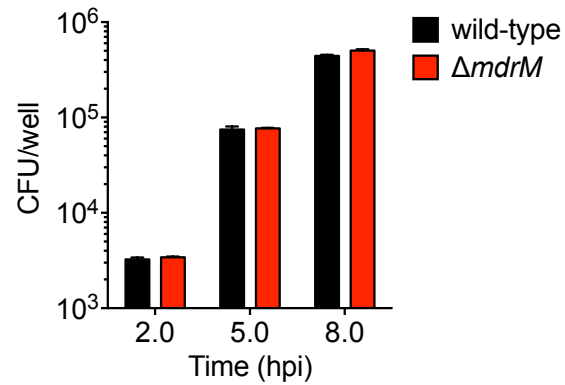

**Supplemental Figure 2 (Related to Main Figure 4). *L. monocytogenes*  $\Delta mdrM$ , which secretes lower c-di-AMP, replicates to similar levels as wild-type in hepatocytes.** WT TIB73 hepatocytes were infected with *L. monocytogenes* wild-type or  $\Delta mdrM$  and plated for CFU at the indicated time points (N = 2). Error bars represent  $\pm$  SD.
