# Supplementary material for: RECON-Dependent Inflammation in Hepatocytes Enhances Listeria monocytogenes Cell-to-Cell Spread
Source: PubMed Central journal article supplement (PMC5954220; doi:10.1128/mbio.00526-18), 2018-05-15
Supplement: mbo003183888st1.pdf [file mbo003183888st1.pdf]

**Key resources table**

| REAGENT or RESOURCE                                                                    | SOURCE                                                 | IDENTIFIER                                                           |
|----------------------------------------------------------------------------------------|--------------------------------------------------------|----------------------------------------------------------------------|
| <b>Antibodies</b>                                                                      |                                                        |                                                                      |
| Difco Listeria O Antiserum Poly Types 1 & 4                                            | Becton Dickinson                                       | Cat#223021                                                           |
| Alexa Fluor 568 Phalloidin                                                             | Thermo Fisher Scientific                               | Cat#A12380                                                           |
| Anti-ActA polyclonal antibody raised against the mature N terminus of the ActA protein | Michelle Reniere                                       | Reniere <i>et al.</i> (Nature, 2015); Lauer <i>et al.</i> (I&I 2008) |
| Anti- <i>Listeria</i> spp. P60 mAb (P6017)                                             | Adiogen                                                | Cat#AG-20A-0023                                                      |
| IRDye 680RD Goat anti-Mouse IgG (1:10,000 dilution)                                    | Licor                                                  | Cat#926-68070                                                        |
| IRDye 800CW Goat anti-Rabbit IgG (1:10,000 dilution)                                   | Licor                                                  | Cat#926-32211                                                        |
| <b>Bacterial and Virus Strains</b>                                                     |                                                        |                                                                      |
| rLVUbi-LifeAct-TagRFP: lentiviral vector                                               | Ibidi                                                  | Cat#60142                                                            |
| <i>Listeria monocytogenes</i> 10403S wild-type                                         | Provided by Dan Portnoy                                | JW06                                                                 |
| <i>Listeria monocytogenes</i> 10403S $\Delta marR$                                     | Provided by Dan Portnoy; Crimmins <i>et al.</i> , 2008 | JW524                                                                |
| <i>Listeria monocytogenes</i> 10403S $\Delta ladR$                                     | Provided by Dan Portnoy; Crimmins <i>et al.</i> , 2008 | JW523                                                                |
| <i>Listeria monocytogenes</i> 10403S $\Delta mdrM$                                     | Provided by Dan Portnoy; Crimmins <i>et al.</i> , 2008 | JW07                                                                 |
| <i>Listeria monocytogenes</i> 10403S $\Delta inlC$                                     | Provided by Dan Portnoy                                | JW551                                                                |
| <i>Listeria monocytogenes</i> 10403S PrfA*                                             | Provided by Dan Portnoy; Wong and Freitag, 2004        | JW130                                                                |
| <i>Listeria monocytogenes</i> 10403S $\Delta actA$                                     | Provided by Dan Portnoy                                | JW367                                                                |
| <i>Listeria monocytogenes</i> 10403S pPL2: <i>actA</i>                                 | This study                                             | JW618                                                                |
| <i>Listeria monocytogenes</i> 10403S $\Delta actA::actA$                               | This study                                             | JW620                                                                |
| <i>Listeria monocytogenes</i> pPL2-actA-GFP                                            | Provided by JD Sauer                                   | JW480                                                                |
| <i>Burkholderia thailandensis</i> strain E264 $\Delta motA2$                           | French <i>et al.</i> , 2011                            | N/A                                                                  |
| <i>Escherichia coli</i> XL1 Blue                                                       | N/A                                                    | N/A                                                                  |
| <i>Bacillus subtilis</i> strain 168                                                    | Provided by Houra Merrikh                              | HM01/JW227                                                           |
| <i>Staphylococcus aureus</i> strain Newman                                             | Provided by Dan Portnoy                                | N/A                                                                  |
| <b>Chemicals, Peptides, and Recombinant Proteins</b>                                   |                                                        |                                                                      |
| DMEM, high glucose, no glutamine, no phenol red                                        | Thermo Fisher Scientific                               | Cat#31053036                                                         |
| Sodium pyruvate                                                                        | Thermo Fisher Scientific                               | Cat#11360070                                                         |
| L-Glutamine                                                                            | Thermo Fisher Scientific                               | Cat#25030081                                                         |
| Characterized Fetal Bovine Serum                                                       | Thermo Fisher Scientific                               | Cat#SH30071.03                                                       |
| Penicillin-Streptomycin (10,000 U/mL)                                                  | Thermo Fisher Scientific                               | Cat#15140122                                                         |
| Bovine Serum Albumin (BSA)                                                             | Fisher BioReagents                                     | Cat#BP9700100                                                        |

|                                                              |                                                                    |                                           |
|--------------------------------------------------------------|--------------------------------------------------------------------|-------------------------------------------|
| Trypsin-EDTA (0.05%)                                         | Thermo Fisher Scientific                                           | Cat#25300054                              |
| Brain Heart Infusion Broth                                   | Research Products International                                    | Cat#B11000                                |
| Tryptic soy broth (TSB)                                      | BD Dianostics                                                      | Cat#211825                                |
| Gentamicin (10 mg/mL)                                        | Thermo Fisher Scientific                                           | Cat#15710072                              |
| Dimethyl sulfoxide                                           | Sigma-Aldrich                                                      | Cat#D2650                                 |
| Celastrol                                                    | InvivoGen                                                          | Cat#ant-cl5                               |
| L-NIL hydrochloride                                          | Cayman Chemical                                                    | Cat#80310                                 |
| DEA NONOate (DEA/NO)                                         | Cayman Chemical                                                    | Cat#82100                                 |
| NOC-12                                                       | Sigma-Aldrich                                                      | Cat#487955                                |
| Pierce 16% formaldehyde                                      | Thermo Fisher Scientific                                           | Cat#28908                                 |
| Neutral Red solution                                         | Sigma-Aldrich                                                      | Cat#N6264                                 |
| BioCoat Collagen I 22mm round coverslips                     | Corning                                                            | Cat#354089                                |
| Prolong Diamond Antifade Mountant                            | Thermo Fisher Scientific                                           | Cat#P36961                                |
| Critical Commercial Assays                                   |                                                                    |                                           |
| TURBO DNA-free Kit                                           | Thermo Fisher Scientific                                           | Cat#AM1907                                |
| iScript cDNA synthesis kit                                   | Bio-Rad                                                            | Cat#1708891                               |
| Maxima SYBR Green/ROX qPCR Master Mix                        | Thermo Fisher Scientific                                           | Cat#K0221                                 |
| RNAqueous Total RNA Isolation Kit                            | Thermo Fisher Scientific                                           | Cat#AM1912                                |
| TaqMan pre-designed assay: murine <i>Nos2</i>                | Thermo Fisher Scientific                                           | Mm00440502_m1                             |
| TaqMan pre-designed assay: murine <i>Hprt</i>                | Thermo Fisher Scientific                                           | Mm03024075_m1                             |
| Experimental Models: Cell Lines                              |                                                                    |                                           |
| TIB73                                                        | ATCC                                                               | ATCC Cat# BNL CL.2 TIB-73; RRID:CVCL_4383 |
| TIB73 mutant <i>Akr1c13</i>                                  | McFarland et al., 2017                                             | N/A                                       |
| TIB73 mutant <i>Akr1c13</i> with MSCV- <i>Akr1c13</i> -WT    | McFarland et al., 2017                                             | N/A                                       |
| TIB73 mutant <i>Akr1c13</i> with MSCV- <i>Akr1c13</i> -H117A | McFarland et al., 2017                                             | N/A                                       |
| Huh7                                                         | Provided by Ram Savan; McFarland et al., 2014; Jarret et al., 2016 | RRID:CVCL_0336                            |
| Caco-2                                                       | Provided by Ram Savan; Lim et al., 2016                            | RRID:CVCL_0025                            |
| Oligonucleotides                                             |                                                                    |                                           |
| <i>Lm</i> 16S forward primer: CAAGCGTTGTCCGGATTTATTG         | This paper                                                         | N/A                                       |
| <i>Lm</i> 16S reverse primer: GCACTCCAGTCTTCCAGTTT           | This paper                                                         | N/A                                       |
| <i>Lm</i> <i>actA</i> forward primer: ACGGGACCAAGATACGAA     | This paper                                                         | N/A                                       |
| <i>Lm</i> <i>actA</i> reverse primer: GCATGCTAGAATCTAAGTCAC  | This paper                                                         | N/A                                       |
| <i>Lm</i> <i>hly</i> forward primer: CGCGGATGAATTCGATAG      | This paper                                                         | N/A                                       |
| <i>Lm</i> <i>hly</i> reverse primer: GTCATACCCGGGAAATCAATG   | This paper                                                         | N/A                                       |
| <i>Lm</i> <i>inlC</i> forward primer: AATTCCACAGGACACAACC    | This paper                                                         | N/A                                       |
| <i>Lm</i> <i>inlC</i> reverse primer: CGGGAATGCAATTTTTCACTA  | This paper                                                         | N/A                                       |
| <i>Lm</i> <i>plcA</i> forward primer: TTCGGGGAATTCATGATTAG   | This paper                                                         | N/A                                       |
| <i>Lm</i> <i>plcA</i> reverse primer: CACTACTCCCGGGACTGAG    | This paper                                                         | N/A                                       |
| <i>Lm</i> <i>plcB</i> forward primer: CCAGTAGGATCCACTGTATC   | This paper                                                         | N/A                                       |

|                                                            |                    |                                                                                                                                                       |
|------------------------------------------------------------|--------------------|-------------------------------------------------------------------------------------------------------------------------------------------------------|
| <i>Lm plcB</i> reverse primer:<br>CTTATTTCCCGGGTTTTGCTAATG | This paper         | N/A                                                                                                                                                   |
| <i>Lm prfA</i> forward primer: CAGCTGAGCTATGTGCGAT         | This paper         | N/A                                                                                                                                                   |
| <i>Lm prfA</i> reverse primer: ACCAATGGGATCCACAAG          | This paper         | N/A                                                                                                                                                   |
| <b>Software and Algorithms</b>                             |                    |                                                                                                                                                       |
| ImageJ                                                     | ImageJ Software    | <a href="https://imagej.nih.gov/ij/">https://imagej.nih.gov/ij/</a>                                                                                   |
| BZ-X700 series microscope analysis application             | Keyence            | BZ-H3AE                                                                                                                                               |
| GraphPad Prism 6                                           | GraphPad Software  | <a href="http://www.graphpad.com/scientificsoftware/prism/">http://www.graphpad.com/scientificsoftware/prism/</a>                                     |
| Metamorph                                                  | Molecular Devices  | <a href="https://www.moleculardevices.com/systems/metamorph-research-imaging">https://www.moleculardevices.com/systems/metamorph-research-imaging</a> |
| Leica Application Suite, V4                                | Leica Microsystems | <a href="https://www.leica-microsystems.com/products/microscope-software/">https://www.leica-microsystems.com/products/microscope-software/</a>       |
